# Supplementary material for: Neuromedin U has a novel anorexigenic effect independent of the leptin signaling pathway
Source: Springer Nature journal article supplement (doi:10.1038/nm1106), 2004-09-26
Supplement: nm1106-S3.pdf [file nm1106-S3.pdf]

**a**

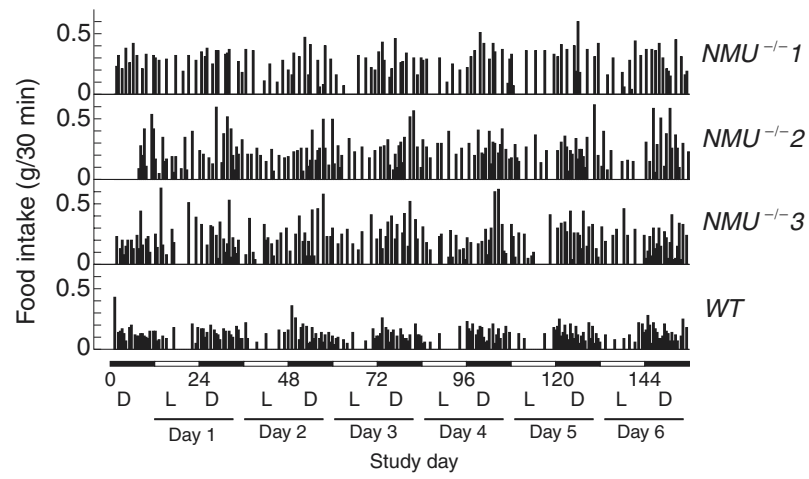

**b**

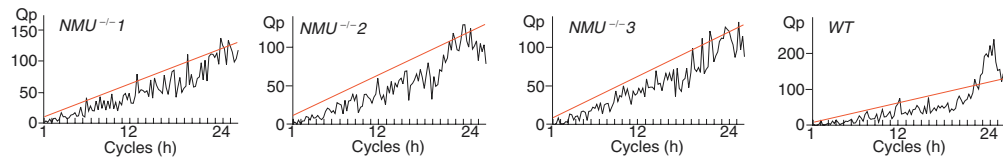

**Supplementary Figure 3** Circadian phenotypes of feeding behavior in *NMU<sup>-/-</sup>* mice and WT mouse. **(a)** Representative food intake of three *NMU<sup>-/-</sup>* mice and one WT mouse housed under the same conditions. LD, 12 hr light/12 hr dark cycles. **(b)**  $\chi^2$  periodogram analyses of *NMU<sup>-/-</sup>* mice and WT mouse. To determine the period length, 6-day intervals during which the circadian periods appeared to be stable with respect to the activity record were analyzed with a  $\chi^2$  periodogram analysis. All analysis clearly indicated the lack of a circadian rhythm of diurnal feeding in *NMU<sup>-/-</sup>* mice, while WT mouse showed a clear rhythm with a 23.25-24.75 hr period. Red lines in the periodograms represent the statistical significance level ( $P = 0.05$ ).
